# Supplementary material for: Arrhythmogenic Mitral Valve Prolapse
Source: PubMed Central journal article supplement — Arrhythm Electrophysiol Rev. 2022 Apr;11:e16. doi: 10.15420/aer.2021.28 (PMC9376835; doi:10.15420/aer.2021.28), 2022-04

## Supplemental Material

**Supplementary Figure 1:** Rhythm Holter with PVC Including Bigeminy.

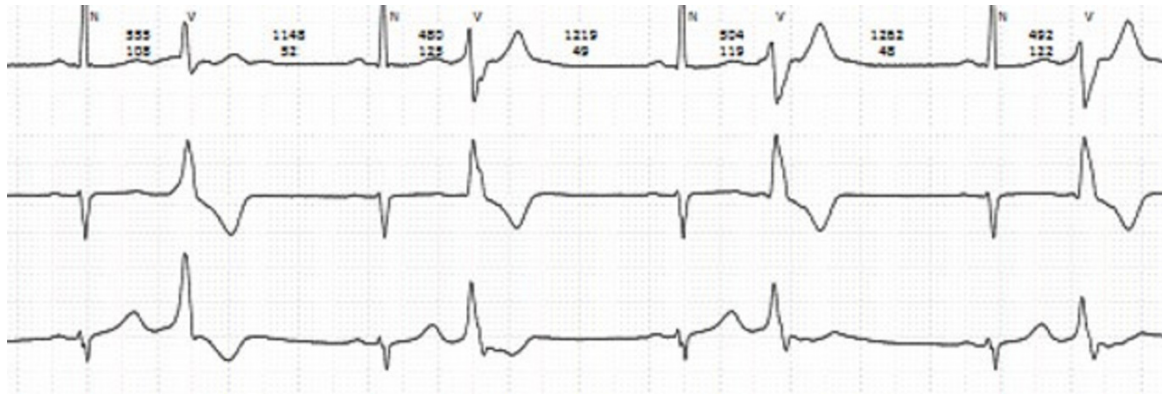

**Supplementary Figure 2:** Parasternal Long Axis View Echocardiogram Displaying MAD in Systole.

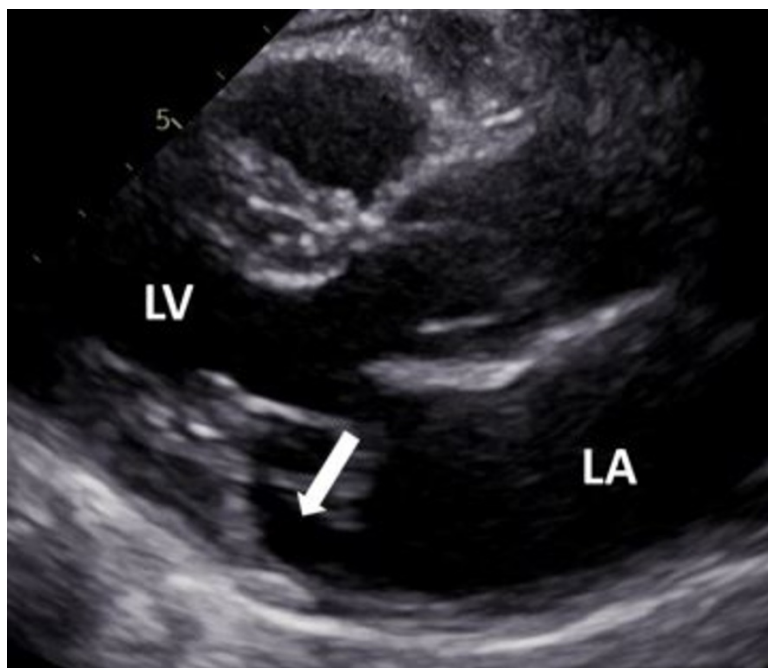

**Supplementary Figure 3:** Zoomed Parasternal Long Axis View Echocardiogram Displaying MAD in Systole (Blue Line).

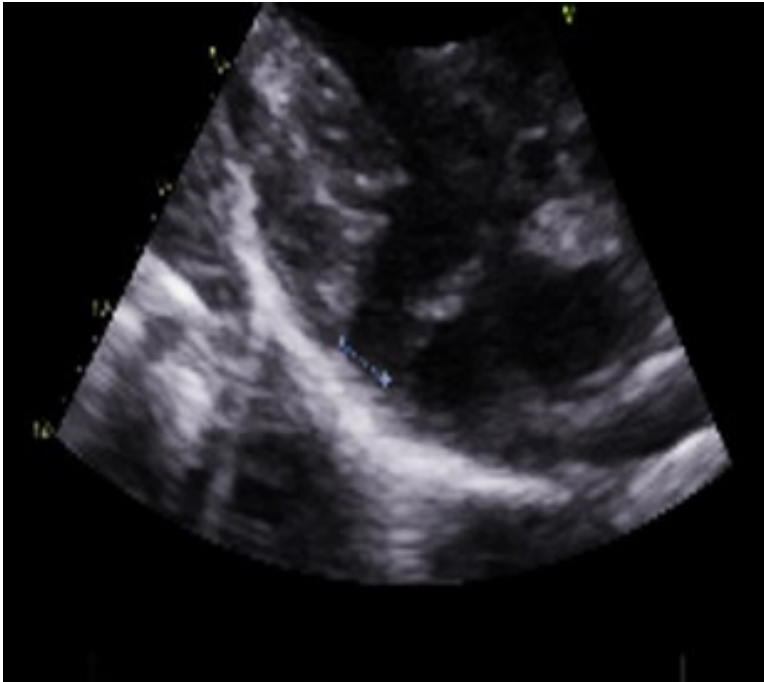

Supplement: aer-11-e16-Supp.pdf [file aer-11-e16-Supp.pdf]
